# Supplementary material for: Positronium image of the human brain in vivo
Source: PubMed Central journal article supplement — Sci Adv. 2024 Sep 13;10(37):eadp2840. doi: 10.1126/sciadv.adp2840 (PMC11397496; doi:10.1126/sciadv.adp2840), 2024-09-13
Supplement: sciadv.adp2840_sm.pdf [file sciadv.adp2840_sm.pdf]

Supplementary Materials for  
**Positronium image of the human brain in vivo**

Paweł Moskal *et al.*

Corresponding author: Paweł Moskal, p.moskal@uj.edu.pl; Ewa Ł. Stępień, e.stepien@uj.edu.pl

*Sci. Adv.* **10**, eadp2840 (2024)  
DOI: 10.1126/sciadv.adp2840

**This PDF file includes:**

Tables S1 to S4

Table S1: Data for positron lifetime spectra shown in Fig. 3.

| $\Delta T$ [ns] | Glioblastoma tumor | Salivary glands | Brain |
|-----------------|--------------------|-----------------|-------|
| -9,6            | 4                  | 6               | 0     |
| -9,2            | 8                  | 15              | 0     |
| -8,8            | 8                  | 12              | 0     |
| -8,4            | 7                  | 15              | 3     |
| -8              | 10                 | 12              | 2     |
| -7,6            | 6                  | 13              | 4     |
| -7,2            | 8                  | 11              | 2     |
| -6,8            | 2                  | 6               | 1     |
| -6,4            | 8                  | 12              | 3     |
| -6              | 11                 | 17              | 2     |
| -5,6            | 3                  | 12              | 3     |
| -5,2            | 9                  | 12              | 3     |
| -4,8            | 7                  | 10              | 1     |
| -4,4            | 9                  | 12              | 2     |
| -4              | 8                  | 9               | 1     |
| -3,6            | 10                 | 12              | 1     |
| -3,2            | 5                  | 10              | 3     |
| -2,8            | 3                  | 5               | 3     |
| -2,4            | 7                  | 16              | 2     |
| -2              | 7                  | 12              | 6     |
| -1,6            | 4                  | 12              | 3     |
| -1,2            | 10                 | 17              | 5     |
| -0,8            | 14                 | 21              | 5     |
| -0,4            | 17                 | 29              | 12    |
| 0               | 21                 | 48              | 13    |
| 0,4             | 48                 | 78              | 22    |
| 0,8             | 76                 | 117             | 32    |
| 1,2             | 65                 | 116             | 45    |
| 1,6             | 40                 | 104             | 31    |
| 2               | 16                 | 89              | 21    |
| 2,4             | 13                 | 39              | 8     |
| 2,8             | 17                 | 39              | 23    |
| 3,2             | 10                 | 31              | 17    |
| 3,6             | 16                 | 35              | 9     |
| 4               | 9                  | 21              | 13    |
| 4,4             | 11                 | 23              | 14    |
| 4,8             | 10                 | 15              | 7     |
| 5,2             | 13                 | 22              | 5     |
| 5,6             | 11                 | 15              | 6     |
| 6               | 7                  | 11              | 2     |
| 6,4             | 10                 | 18              | 5     |
| 6,8             | 6                  | 14              | 1     |
| 7,2             | 7                  | 11              | 4     |
| 7,6             | 10                 | 20              | 5     |
| 8               | 3                  | 16              | 2     |
| 8,4             | 4                  | 17              | 3     |
| 8,8             | 5                  | 18              | 5     |
| 9,2             | 10                 | 15              | 3     |
| 9,6             | 8                  | 22              | 2     |

Table S2: Counts in voxels for  $2\gamma + \gamma_{prompt}$  image in Fig. 3D.

| Voxel \ Voxel | 1  | 2  | 3  | 4  | 5  | 6  | 7  | 8  | 9  | 10 | 11 | 12 |
|---------------|----|----|----|----|----|----|----|----|----|----|----|----|
| 1             | 11 | 13 | 12 | 7  | 18 | 13 | 17 | 10 | 16 | 11 | 9  | 2  |
| 2             | 11 | 17 | 11 | 14 | 15 | 34 | 15 | 29 | 13 | 13 | 15 | 14 |
| 3             | 2  | 11 | 16 | 22 | 27 | 36 | 40 | 25 | 18 | 7  | 9  | 7  |
| 4             | 7  | 12 | 17 | 21 | 31 | 57 | 53 | 37 | 25 | 19 | 16 | 17 |
| 5             | 8  | 4  | 19 | 26 | 30 | 70 | 88 | 62 | 34 | 26 | 8  | 9  |
| 6             | 11 | 15 | 9  | 16 | 33 | 37 | 52 | 41 | 17 | 15 | 13 | 10 |
| 7             | 13 | 8  | 20 | 9  | 28 | 20 | 18 | 28 | 22 | 16 | 7  | 5  |
| 8             | 10 | 9  | 11 | 6  | 12 | 19 | 18 | 20 | 23 | 6  | 9  | 7  |
| 9             | 8  | 8  | 5  | 7  | 13 | 5  | 17 | 18 | 13 | 9  | 11 | 8  |
| 10            | 8  | 4  | 5  | 2  | 15 | 9  | 8  | 7  | 4  | 9  | 12 | 5  |
| 11            | 6  | 6  | 3  | 8  | 9  | 11 | 7  | 6  | 10 | 8  | 7  | 4  |
| 12            | 4  | 4  | 4  | 2  | 4  | 0  | 7  | 8  | 7  | 6  | 5  | 6  |

Table S3: Counts in voxels for  $2\gamma + \gamma_{prompt}$  image in Fig. 3E.

| Voxel \ Voxel | 1 | 2  | 3  | 4  | 5  | 6  | 7  | 8  | 9  | 10 | 11 | 12 |
|---------------|---|----|----|----|----|----|----|----|----|----|----|----|
| 1             | 2 | 5  | 3  | 19 | 14 | 11 | 18 | 4  | 9  | 8  | 11 | 2  |
| 2             | 4 | 5  | 24 | 22 | 25 | 22 | 14 | 23 | 13 | 8  | 5  | 4  |
| 3             | 7 | 12 | 19 | 40 | 36 | 31 | 24 | 24 | 12 | 8  | 7  | 3  |
| 4             | 8 | 8  | 26 | 45 | 57 | 47 | 24 | 21 | 14 | 14 | 4  | 0  |
| 5             | 2 | 10 | 28 | 75 | 85 | 59 | 29 | 21 | 12 | 13 | 4  | 4  |
| 6             | 0 | 5  | 24 | 34 | 60 | 35 | 26 | 15 | 18 | 14 | 6  | 8  |
| 7             | 4 | 2  | 13 | 24 | 28 | 22 | 16 | 18 | 9  | 12 | 14 | 7  |
| 8             | 4 | 9  | 9  | 12 | 14 | 22 | 18 | 10 | 8  | 18 | 9  | 6  |
| 9             | 4 | 2  | 9  | 12 | 10 | 17 | 12 | 10 | 18 | 15 | 15 | 11 |
| 10            | 0 | 6  | 4  | 6  | 13 | 6  | 12 | 6  | 21 | 10 | 5  | 6  |
| 11            | 0 | 7  | 7  | 8  | 12 | 2  | 12 | 2  | 9  | 8  | 7  | 2  |
| 12            | 3 | 5  | 2  | 4  | 2  | 5  | 8  | 8  | 7  | 11 | 2  | 8  |

Table S4: Counts in voxels for  $2\gamma + \gamma_{prompt}$  image in Fig. 3F.

| Voxel \ Voxel | 1 | 2  | 3  | 4  | 5  | 6  | 7  | 8  | 9  | 10 | 11 | 12 |
|---------------|---|----|----|----|----|----|----|----|----|----|----|----|
| 1             | 2 | 5  | 6  | 9  | 12 | 5  | 7  | 5  | 3  | 11 | 5  | 2  |
| 2             | 2 | 3  | 9  | 7  | 15 | 11 | 17 | 17 | 14 | 11 | 5  | 4  |
| 3             | 2 | 7  | 7  | 17 | 16 | 20 | 12 | 2  | 15 | 10 | 8  | 2  |
| 4             | 6 | 6  | 15 | 24 | 23 | 22 | 15 | 14 | 11 | 8  | 3  | 2  |
| 5             | 4 | 8  | 23 | 33 | 34 | 23 | 23 | 16 | 11 | 13 | 10 | 6  |
| 6             | 2 | 12 | 32 | 56 | 64 | 55 | 27 | 20 | 13 | 14 | 7  | 4  |
| 7             | 5 | 5  | 28 | 49 | 85 | 57 | 29 | 26 | 18 | 12 | 2  | 5  |
| 8             | 4 | 9  | 23 | 54 | 57 | 37 | 23 | 28 | 16 | 10 | 4  | 2  |
| 9             | 3 | 7  | 15 | 18 | 26 | 26 | 22 | 20 | 9  | 11 | 10 | 2  |
| 10            | 4 | 4  | 5  | 18 | 18 | 16 | 23 | 15 | 11 | 9  | 6  | 6  |
| 11            | 2 | 10 | 3  | 14 | 14 | 15 | 15 | 16 | 12 | 7  | 2  | 8  |
| 12            | 3 | 0  | 12 | 14 | 14 | 11 | 6  | 9  | 14 | 7  | 0  | 7  |
